## Carbapenemase-producing *Escherichia coli* is becoming more prevalent in Spain mainly because of the polyclonal dissemination of OXA-48

Adriana Ortega<sup>1,2</sup>, David Sáez<sup>1</sup>, Verónica Bautista<sup>1,2</sup>, Sara Fernández-Romero<sup>1,2</sup>, Noelia Lara<sup>1,2</sup>, Belén Aracil<sup>1,2</sup>, María Pérez-Vázquez<sup>1,2</sup>, José Campos<sup>1-3</sup> and Jesús Oteo<sup>1,2\*</sup> on behalf of the Spanish Collaborating Group for the Antibiotic Resistance Surveillance Program†

<sup>1</sup>Laboratorio de Referencia e Investigación en Resistencia a Antibióticos e Infecciones Relacionadas con la Asistencia Sanitaria, Centro Nacional de Microbiología, Majadahonda, Madrid, Spain; <sup>2</sup>Red Española de Investigación en Patología Infecciosa (REIPI), Spain; <sup>3</sup>Consejo Superior de Investigaciones Científicas, Madrid, Spain

\*Corresponding author. Centro Nacional de Microbiología, Instituto de Salud Carlos III, Carretera Pozuelo a Majadahonda, 28220 Majadahonda, Madrid, Spain. Tel: +34-918223650; Fax: +34-915097966; E-mail: [jesus.oteo@isciii.es](mailto:jesus.oteo@isciii.es)

†Other members are listed in the Acknowledgements section.

Received 3 February 2016; returned 22 February 2016; revised 4 March 2016; accepted 30 March 2016

**Objectives:** The objective of this study was to analyse the microbiological traits and the population structure of carbapenemase-producing (CP) *Escherichia coli* isolates collected in Spain between 2012 and 2014.

**Methods:** Two-hundred-and-thirty-nine *E. coli* isolates non-susceptible to carbapenems were studied. The carbapenemase genes and the phylogenetic groups were characterized using PCR. MLST was carried out using the typing schemes of the University of Warwick and the Institut Pasteur. The diversity of the population structure was estimated by calculating a simple diversity index (SDI).

**Results:** One-hundred-and-twenty-one isolates (50.6%) produced carbapenemases, of which 87 (71.9%) were OXA-48, 27 (22.3%) were VIM-1, 4 (3.3%) were KPC-2, 2 (1.7%) were NDM and 1 (0.8%) was IMP-22; 4 isolates were collected in 2012, 40 in 2013 and 77 in 2014. Ertapenem was more sensitive than imipenem or meropenem for screening for OXA-48-producing *E. coli*. Using the Warwick typing scheme, 59 different STs were identified, the most prevalent being ST131 (16.5%). The population diversity was higher among VIM-1-producing isolates (SDI=81.5%) than among OXA-48-producing isolates (SDI=44.8%). The Pasteur scheme had a higher discrimination capability (SDI=55.4%) than the Warwick scheme (SDI=48.8%).

**Conclusions:** A progressive increase in the prevalence of CP *E. coli* was observed, mainly due to the dissemination of OXA-48 producers. The most sensitive method for detecting decreased susceptibility of CP *E. coli* to carbapenems was disc diffusion with ertapenem using the EUCAST screening cut-offs. The spread of CP *E. coli* was due to a polyclonal population. The Pasteur scheme showed the highest discrimination power. Surveillance is crucial for the early detection of CP *E. coli*.

### Introduction

The increase in the number of carbapenemase-producing (CP) Enterobacteriaceae (CPE) is a serious threat to public health. This is because carbapenems are often the treatment option of last resort against infections caused by MDR Gram-negative bacilli.<sup>1</sup> Carbapenemases are  $\beta$ -lactamases that are able to hydrolyse nearly all the  $\beta$ -lactam antibiotics. The most clinically important carbapenemases in Enterobacteriaceae are the class A KPC, the class B VIM, IMP and NDM, and the class D OXA-48 type.<sup>1</sup> Thus far, the greatest epidemiological and clinical impact of CPE worldwide has been due to the high incidence of nosocomial infections caused by *Klebsiella pneumoniae*. However, over the last few years other CP species, such as *Enterobacter* spp.,

*Klebsiella oxytoca* and *Serratia marcescens*, have also been detected in nosocomial settings.<sup>2</sup>

In contrast to *K. pneumoniae*, much less is known about the CP *E. coli*. The information that is available is in reference to the NDM and OXA-48 classes.<sup>2-4</sup> Of concern is the fact that the acquisition of carbapenemases by successful *E. coli* clones, such as ST131, has already occurred.<sup>4</sup>

According to recent data,<sup>5</sup> eight phylogroups are now recognized, of which seven (A, B1, B2, C, D, E and F) belong to *E. coli sensu stricto* and one belongs to the *Escherichia cryptic* clade I. Recently, we observed that some highly virulent phylogroup A isolates could be further reclassified as phylogroup C according to this new classification.<sup>6</sup> Classically, most extraintestinal pathogenic *E. coli* isolates belong to phylogenetic group B2 and, to a

lesser extent, to group D. However, *E. coli* isolates of phylogroups A and B1 are mainly found as part of the intestinal commensal population.

MLST is an unambiguous method for characterizing bacterial population structure using the sequences of internal fragments of housekeeping genes. Currently there are two accepted *E. coli* MLST schemes: the University of Warwick scheme and the Institut Pasteur scheme.

The possible widespread occurrence of the CP *E. coli* could lead to a new epidemiological crisis similar to that seen with ESBL.<sup>7</sup> In this scenario, a likely fast clonal and polyclonal dissemination in a variety of settings, including community settings, would greatly increase the threat of CPE. In the light of this possibility, the aims of this study were: (i) to study the epidemiological and microbiological trends in CP *E. coli* isolates collected in Spain between 2012 and 2014; (ii) to analyse the population structure of CP *E. coli* in Spain using the two different MLST schemes; and (iii) to test and compare the discriminatory power of these MLST schemes.

## Materials and methods

### Study design and bacterial isolates

Since 2009, our official public health institute has been operating an active, unrestricted and non-mandatory National Antibiotic Resistance Surveillance Programme.<sup>8</sup> All carbapenem-non-susceptible *E. coli* detected between January 2012 and December 2014 were included in this study. Only the first isolate taken from each patient was analysed.

Standard microbiological methods and the API 20E system (bioMérieux, Marcy-l'Étoile, France) were used to identify the *E. coli* isolates. When necessary, the species identification was confirmed by 16S ribosomal DNA sequencing.

### Antibiotic susceptibility and phenotypic characterization of carbapenemase production

Antibiotic susceptibility tests were performed using the disc diffusion method according to the EUCAST guidelines.<sup>9,10</sup> In addition, susceptibility to imipenem, meropenem, ertapenem, colistin, fosfomicin, tigecycline and temocillin was tested using MIC strips (Liofilchem, Italy). Carbapenem non-susceptibility was defined as decreased susceptibility to at least to one of the carbapenems tested. EUCAST screening cut-off values were employed in the analysis.<sup>11</sup>

Following EUCAST recommendations, inhibition of carbapenemase activity was carried out using EDTA, phenyl-boronic acid and cloxacillin.<sup>11</sup> ESBL production was detected using the combination disc and double-disc synergy test, according to EUCAST guidelines.<sup>11</sup> Carba NP method and the modified Hodge test with a meropenem disc containing 600 µg of cloxacillin<sup>12,13</sup> were carried out in all isolates.

### Characterization of β-lactamases

The presence of genes encoding carbapenemases (*bla*<sub>OXA-48</sub>, *bla*<sub>KPC</sub>, *bla*<sub>VIM</sub>, *bla*<sub>IMP</sub> and *bla*<sub>NDM</sub>),<sup>8,14,15</sup> ESBLs (*bla*<sub>TEM</sub>, *bla*<sub>SHV</sub> and *bla*<sub>CTX-M</sub>)<sup>16</sup> and plasmid-mediated AmpC (*bla*<sub>CMY</sub>, *bla*<sub>FOX</sub>, *bla*<sub>MOX</sub>, *bla*<sub>DHA</sub>, *bla*<sub>EBC</sub> and *bla*<sub>ACC</sub>)<sup>17</sup> was determined using PCR and DNA sequencing assays. The sequences obtained were compared with those available in the publicly accessible GenBank and Lahey Clinic (<http://www.lahey.org/Studies/>) databases.

### Molecular epidemiology

The phylogenetic groups were determined by PCR according to the new Clermont method.<sup>5</sup> MLST of each isolate was carried out using the

Warwick (<http://mlst.warwick.ac.uk/mlst/dbs/Ecoli>) and Pasteur (<http://bigsd.web.pasteur.fr/ecoli/>) typing schemes. Serotypes O25b and O16 were identified by allele-specific PCR, as described.<sup>18,19</sup>

The genetic relationship between the CP *E. coli* isolates belonging to the same ST was elucidated by PFGE after total chromosomal DNA digestion with XbaI.<sup>16</sup>

As previously described by Gastmeier *et al.*,<sup>20</sup> in order to analyse the population diversity a simple diversity index (SDI) was calculated as follows: number of STs/total number of isolates × 100.

### Statistical analysis

The significance of the CP *E. coli* trends was calculated using the  $\chi^2$  test for trends. Differences in the prevalence values for the resistance mechanisms of the different CP isolates and STs were assessed using Fisher's exact test. The null hypothesis was rejected when a *P* value  $\leq 0.05$  was calculated. Statistical analysis was performed using the GraphPad Prism software, version 3.02 (GraphPad Software, Inc., San Diego, CA, USA).

## Results and discussion

### Bacterial isolates

From January 2012 to December 2014, 239 isolates of carbapenem-non-susceptible *E. coli* were analysed. Of these, 121 (50.6%) produced carbapenemases. Over the same period of time, our reference laboratory identified a total of 2443 CPE, of which 121 (4.9%) were CP *E. coli*. A clear upward trend was observed in the percentage of CPE isolates identified as CP *E. coli* annually: 1.7% in 2012 (4 out of 237), 5.2% in 2013 (40 out of 775) and 5.4% in 2014 (77 out of 1431) ( $\chi^2$  test for trend = 4.27; *P* = 0.038). These CP *E. coli* isolates came from 39 Spanish hospitals, which were located in 12 geographical areas (range of isolates per hospital 1–16).

Sixty-six out of the total of 121 CP *E. coli* isolates (54.5%) were from males while 85 (70.2%) were from patients >65 years of age. Fifty-six out of the total number of CP *E. coli* isolates (46.3%) produced clinical infections, mainly urinary tract (20; 35.7%) or wound (20; 35.7%) infections. The remaining 65 isolates (53.7%) were obtained from carriers, mainly from rectal samples (*n* = 61; 93.8%).

An upward trend in the detection of CP *E. coli* had been observed in other countries,<sup>21,22</sup> although the total number of cases remained low.<sup>22–25</sup> Of the 47 843 isolates of *E. coli* collected worldwide and studied by Peirano *et al.*,<sup>4</sup> only 116 (0.24%) were CP. According to the EARS-Net database, carbapenem resistance in blood isolates of *E. coli* is <1% in the vast majority of European countries.

The CP *E. coli* trend described in this study in Spain occurred after a continuous increase in resistance to third-generation cephalosporins (from 2.2% in 2002 to 12.5% in 2014) and fluoroquinolones (from 19.3% in 2002 to 34% in 2014) in blood isolates of *E. coli* reported to the EARS-Net database by Spanish hospitals ([http://ecdc.europa.eu/en/healthtopics/antimicrobial\\_resistance/database/Pages/database.aspx](http://ecdc.europa.eu/en/healthtopics/antimicrobial_resistance/database/Pages/database.aspx)). Furthermore, the overall prevalence of infection caused by CP *K. pneumoniae* increased from 0.2% in 2009 to 1.7% in 2013 in Spain.<sup>2</sup>

In a recent Spanish study,<sup>26</sup> 40% of infections caused by CPE, specifically OXA-48 producers, were community onset, but most of them were healthcare associated; only 9 of the 245 (3.6%) cases were community acquired.

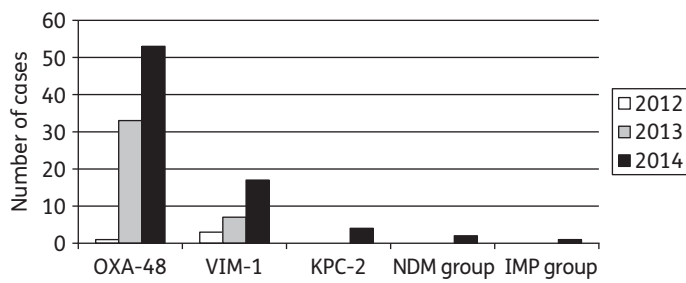

**Figure 1.** Annual evolution (2012–14) of CP *E. coli* in Spain.

### Types of carbapenemases

Of the 121 CP *E. coli* isolates, 87 (71.9%) produced OXA-48; 27 (22.3%) produced VIM-1, 4 (3.3%) produced KPC-2, 2 (1.7%) produced NDM (1 NDM-1 and 1 NDM-5) and 1 (0.8%) produced IMP-22. Annual changes in CP *E. coli* number of cases according to the type of carbapenemase detected are shown in Figure 1. Consistent with the results of studies carried out in other countries,<sup>22,24,27–31</sup> the type of carbapenemase most frequently identified in *E. coli* in this study was OXA-48. KPC-producing Enterobacteriaceae are the main cause of the endemic CPE situation in some European countries, such as Italy and Greece.<sup>27</sup> However, the epidemiology of CPE has worsened in Europe over the last 2 years due to the rapid spread of *K. pneumoniae* producing OXA-48 in countries such as France, Spain and Turkey.<sup>2,22,27,28</sup> In contrast, in a worldwide study of ST131 CP *E. coli* carried out from 2008 to 2013 the carbapenemases most frequently identified were NDM followed by KPC.<sup>4</sup> The most prevalent *E. coli* carbapenemases in Portugal and China were KPC-3 and KPC-2, respectively.<sup>23,32</sup> Interspecies transmission of the *bla*<sub>OXA-48</sub> gene is possible and has been shown to occur between *K. pneumoniae* and *E. coli*.<sup>33</sup>

### Co-production of ESBL and plasmid-mediated AmpC enzymes

Thirty-seven out of the 121 (30.6%) CP *E. coli* isolates also produced ESBL. Of these, 16 (43.3%) produced CTX-M-15, 13 (35.1%) produced CTX-M-14, 6 (16.2%) produced SHV-12, 1 (2.7%) produced CTX-M-1 and 1 (2.7%) produced CTX-M-32. Production of ESBL was more frequently observed in the OXA-48-type isolates; ESBL was detected in 32 out of 87 (36.8%) of these isolates compared with only 3 of 27 (11.1%) VIM-1 isolates ( $P=0.015$ ). In addition, 6 out of 121 (5%) CP *E. coli* isolates co-produced CMY-2; of these, 5 were OXA-48 producers and 1 was a VIM-1 producer.

The percentage of *E. coli* isolates co-producing OXA-48 and ESBLs was much lower than that reported for OXA-48-producing *K. pneumoniae* isolates.<sup>2,34</sup> In contrast with previous reports, we did not detect the CTX-M-24 ESBL, which is thought to associate with OXA-48-producing *E. coli*.<sup>29,34,35</sup>

### Antibiotic susceptibility of CP *E. coli*

All 121 CP *E. coli* isolates were susceptible to tigecycline and colistin; 97.5% were susceptible to amikacin, 92.6% to fosfomycin, 74.4% to gentamicin, 58.7% to aztreonam, 55.4% to tobramycin,

38% to trimethoprim/sulfamethoxazole, 31.4% to ciprofloxacin and 20.7% to cefotaxime.

Of the 50 OXA-48 producers without resistance mechanisms to third-generation cephalosporins, 25 were intermediate or resistant ( $n=23$ ) or highly resistant ( $n=2$ ) to cefotaxime. It has been demonstrated that OXA-48 carbapenemase does not significantly hydrolyse ceftazidime and cefepime but hydrolyses cefotaxime very poorly.<sup>28</sup> The OXA-163 carbapenemase is a variant of OXA-48 that hydrolyses expanded-spectrum cephalosporins but has little hydrolytic activity against carbapenems.<sup>36</sup> This  $\beta$ -lactamase was not detected in the current study.

### Laboratory detection of decreased susceptibility to carbapenems in CP *E. coli*

Using the EUCAST disc diffusion clinical breakpoints,<sup>10</sup> OXA-48- and VIM-1-producing isolates showed a higher percentage of decreased susceptibility to ertapenem (100% and 88.9%, respectively) than imipenem (35.6% and 63%, respectively) and meropenem (49.4% and 40.7%) (Table 1). Using EUCAST MIC clinical breakpoints, ertapenem also showed the highest percentage of non-susceptibility in OXA-48 producers (89.7%), but in VIM-1 producers imipenem had the highest non-susceptibility percentage (40.7%) (Table 1).

Using EUCAST screening cut-offs for carbapenemases,<sup>11</sup> OXA-48-producing isolates were best detected by ertapenem rather than meropenem or imipenem. This was true both when using the disc diffusion method and when using MIC strips (Table 1). VIM-1 producers were best detected by ertapenem when using disc diffusion and most effectively detected by meropenem when using MIC strips (Table 1). The specificity of the data was not calculated.

In general, disc diffusion was better for detecting the non-susceptibility of CP *E. coli* to carbapenems than MIC strips. In addition, employing ertapenem was better for screening OXA-48 *E. coli* than imipenem or meropenem. These observations were consistent with previous studies of OXA-48-producing Enterobacteriaceae.<sup>30,34,37,38</sup> However, using ertapenem as the only marker in the screening of carbapenemase activity in *Enterobacter* spp. should be avoided because of the many false positive cases observed.<sup>2,11</sup>

Temocillin has been proposed as a screening agent for OXA-48.<sup>39</sup> The MIC of this antibiotic was found to be  $>128$  mg/L in 85 (97.7%) of OXA-48-producing isolates. The MIC of temocillin for the remaining two isolates was 4 and 8 mg/L, but they tested positive in the modified Hodge test. Woodford *et al.*<sup>40</sup> found that the MIC of temocillin was  $>128$  mg/L in 87.9% of isolates of OXA-48-producing *E. coli*. This observation suggests that a high MIC of temocillin should not be the sole criterion for predicting the presence of OXA-48.

Laboratory detection of CP *E. coli* may be more difficult in comparison with CP *K. pneumoniae*, particularly in the case of OXA-48, because: (i) the isolates may appear susceptible to imipenem and meropenem (Table 1); and (ii) there is a high frequency (63.2% in this study) of OXA-48-producing isolates without ESBL co-production.

### Phylogenetic groups

According to the new Clermont scheme,<sup>5</sup> 32 out of the 121 (26.5%) CP *E. coli* isolates studied belonged to phylogroup B2,

**Table 1.** Detection of non-susceptibility to carbapenems in CP *E. coli* using the methods of disc diffusion and MIC test strips, according to EUCAST clinical breakpoints and EUCAST screening cut-offs for carbapenemases

| Type of carbapenemase (n)         | Carbapenem | Disc diffusion, n (%) |            |                                                                           | MIC test strips, n (%) |           |                                                                           |
|-----------------------------------|------------|-----------------------|------------|---------------------------------------------------------------------------|------------------------|-----------|---------------------------------------------------------------------------|
|                                   |            | S                     | NS         | detection using EUCAST screening cut-offs for carbapenemases <sup>a</sup> | S                      | NS        | detection using EUCAST screening cut-offs for carbapenemases <sup>a</sup> |
| OXA-48 (87)                       | ertapenem  | 0 (0)                 | 87 (100)   | 87 (100)                                                                  | 9 (10.3)               | 78 (89.7) | 86 (98.8)                                                                 |
|                                   | imipenem   | 56 (64.4)             | 31 (35.6)  | 47 (54)                                                                   | 56 (64.4)              | 31 (35.6) | 57 (65.5)                                                                 |
|                                   | meropenem  | 44 (50.6)             | 43 (49.4)  | 74 (85.1)                                                                 | 75 (86.2)              | 12 (13.8) | 84 (96.5)                                                                 |
| VIM-1 (27)                        | ertapenem  | 3 (11.1)              | 24 (88.9)  | 24 (88.9)                                                                 | 22 (81.5)              | 5 (18.5)  | 15 (55.5)                                                                 |
|                                   | imipenem   | 10 (37)               | 17 (63)    | 19 (70.4)                                                                 | 16 (59.3)              | 11 (40.7) | 18 (66.7)                                                                 |
|                                   | meropenem  | 16 (59.3)             | 11 (40.7)  | 19 (70.4)                                                                 | 26 (96.3)              | 1 (3.7)   | 20 (74.1)                                                                 |
| KPC-2 (4)                         | ertapenem  | 0 (0)                 | 4 (100)    | 4 (100)                                                                   | 0 (0)                  | 4 (100)   | 4 (100)                                                                   |
|                                   | imipenem   | 0 (0)                 | 4 (100)    | 4 (100)                                                                   | 0 (0)                  | 4 (100)   | 4 (100)                                                                   |
|                                   | meropenem  | 0 (0)                 | 4 (100)    | 4 (100)                                                                   | 0 (0)                  | 4 (100)   | 4 (100)                                                                   |
| NDM-like (2)                      | ertapenem  | 0 (0)                 | 2 (100)    | 2 (100)                                                                   | 0 (0)                  | 2 (100)   | 2 (100)                                                                   |
|                                   | imipenem   | 0 (0)                 | 2 (100)    | 2 (100)                                                                   | 0 (0)                  | 2 (100)   | 2 (100)                                                                   |
|                                   | meropenem  | 0 (0)                 | 2 (100)    | 2 (100)                                                                   | 0 (0)                  | 2 (100)   | 2 (100)                                                                   |
| Total isolates (121) <sup>b</sup> | ertapenem  | 3 (2.5)               | 118 (97.5) | 118 (97.5)                                                                | 31 (25.6)              | 90 (74.4) | 108 (89.3)                                                                |
|                                   | imipenem   | 67 (55.4)             | 54 (44.6)  | 72 (59.5)                                                                 | 73 (60.3)              | 48 (39.7) | 81 (66.9)                                                                 |
|                                   | meropenem  | 61 (50.4)             | 60 (49.6)  | 100 (82.6)                                                                | 102 (84.3)             | 19 (15.7) | 111 (91.7)                                                                |

n, number of isolates; S, susceptible isolates; NS, non-susceptible isolates.

<sup>a</sup>According to Matuschek et al.<sup>9</sup>

<sup>b</sup>The single imipenem-producing isolate is also included in this analysis.

26 (21.5%) to phylogroup C, 21 (17.4%) to phylogroup B1, 16 (13.2%) to phylogroup E, 13 (10.7%) to phylogroup F, 12 (9.9%) to phylogroup A and 1 (0.8%) to phylogroup D.

Differences between the most frequent phylogroups of OXA-48- and VIM-1-producing isolates are shown in Table 2.

In contrast to previous reports, we observed a higher percentage of *E. coli* isolates in phylogroup C. This was because, using the new typing scheme, some clones were reclassified into this phylogroup, e.g. ST10 and ST23. By the classical Clermont scheme, both of these clones had previously been assigned to phylogroup A.<sup>29</sup> In a recent study, OXA-1-producing *E. coli* isolates were found to belong primarily to phylogroups C and B2.<sup>6</sup>

### Population structure of CP *E. coli* isolates

Using the Warwick MLST scheme, 59 different STs were identified. The most frequent STs and their phylogenetic groups are detailed in Table 3.

ST131, which was the most common ST (20 isolates, 16.5% of the total isolates), was found in 13 of the 39 participating hospitals. These 13 hospitals were located in five different geographical areas. The ST131 isolate was most often found to carry the *bla*<sub>OXA-48</sub> gene (14 of 20 isolates, 70%); however, *bla*<sub>VIM-1</sub> was occasionally detected (4 isolates, 20%), as were KPC-2 (1 isolate, 5%) and NDM-5 (1 isolate, 5%). Out of the 20 ST131 isolates, 7 (35%) were ESBL producers; 6 of these produced CTX-M-15 and one produced SHV-12.

**Table 2.** Different population markers indicating the genetic variations between OXA-48- and VIM-1-producing *E. coli* isolates

| Population marker                   | Resistance mechanism |              |
|-------------------------------------|----------------------|--------------|
|                                     | OXA-48 (N=87)        | VIM-1 (N=27) |
| Number of STs                       | 39                   | 22           |
| Median of isolates per ST (range)   | 2.2 (1–14)           | 1.2 (1–4)    |
| Number of single isolates by ST (%) | 25 (28.7)            | 19 (70.4)    |
| SDI, %                              | 44.8                 | 81.5         |
| ST131, n (%)                        | 14 (16.1)            | 4 (14.8)     |
| ST68, n (%)                         | 8 (9.2)              | 0            |
| Phylogroup C, n (%)                 | 22 (25.3)            | 3 (11.1)     |
| Phylogroup B2, n (%)                | 21 (24.1)            | 8 (29.6)     |
| Phylogroup B1, n (%)                | 13 (14.9)            | 6 (22.2)     |

Comparison between OXA-48- and VIM-1-producing isolates showed a more diverse population in VIM-1-producing isolates (Table 2).

Our results show that, in general, the population structure of CP *E. coli* is more polyclonal than that of CP *K. pneumoniae*.<sup>2,41,42</sup> *E. coli* ST131 is a high-risk clone that disseminates CTX-M-15 worldwide.<sup>7</sup> It is also most likely responsible for the global spread of *bla*<sub>KPC</sub>-producing *E. coli*.<sup>4</sup> ST68 was previously described as a *bla*<sub>CTX-M-14</sub> carrier.<sup>43</sup> We did not detect ST38, a high-risk clone that had been associated with OXA-48-producing *E. coli* isolates.<sup>24,34,35,37,38</sup>



**Table 3.** Correspondence between the most prevalent STs obtained using the Warwick MLST scheme and the Pasteur MLST scheme; phylogroups of these primary STs are also included

| Correspondence between the most prevalent Warwick STs and the Pasteur STs |                |                                  | Correspondence between the most prevalent Pasteur STs and the Warwick STs |                |                                  |
|---------------------------------------------------------------------------|----------------|----------------------------------|---------------------------------------------------------------------------|----------------|----------------------------------|
| phylogroup                                                                | Warwick ST (n) | Pasteur ST (n) <sup>a</sup>      | phylogroup                                                                | Pasteur ST (n) | Warwick ST (n) <sup>b</sup>      |
| B2                                                                        | 131 (20)       | 9 (10), 43 (8), 506 (1), 729 (1) | B2                                                                        | 9 (10)         | 131                              |
| E                                                                         | 68 (8)         | 14 (7), 665 (1)                  | B2                                                                        | 43 (9)         | 131 (8), 2279 (1)                |
| C                                                                         | 10 (7)         | 2 (4), 478 (2), 680 (1)          | C                                                                         | 2 (8)          | 10 (4), 44 (1), 167 (1), 744 (2) |
| C                                                                         | 23 (5)         | 7 (5)                            | E                                                                         | 14 (7)         | 68 (7)                           |
| C                                                                         | 410 (4)        | 471 (4)                          | C                                                                         | 7 (5)          | 23 (5)                           |
| F                                                                         | 648 (4)        | 662 (2), 721 (2)                 | B1                                                                        | 88 (5)         | 101 (2), 359 (2), 3024 (1)       |
| B1                                                                        | 1431 (4)       | 649 (4)                          | C                                                                         | 471 (4)        | 410 (4)                          |
|                                                                           |                |                                  | B1                                                                        | 649 (4)        | 1431 (4)                         |

*n*, number of isolates.

<sup>a</sup>All Pasteur STs belonging to a single Warwick ST were either a single-locus variant or a double-locus variant, except for ST506, which had five different alleles related to ST9, ST43 and ST729.

<sup>b</sup>All Warwick STs belonging to a single Pasteur ST were either a single-locus variant or a double-locus variant.

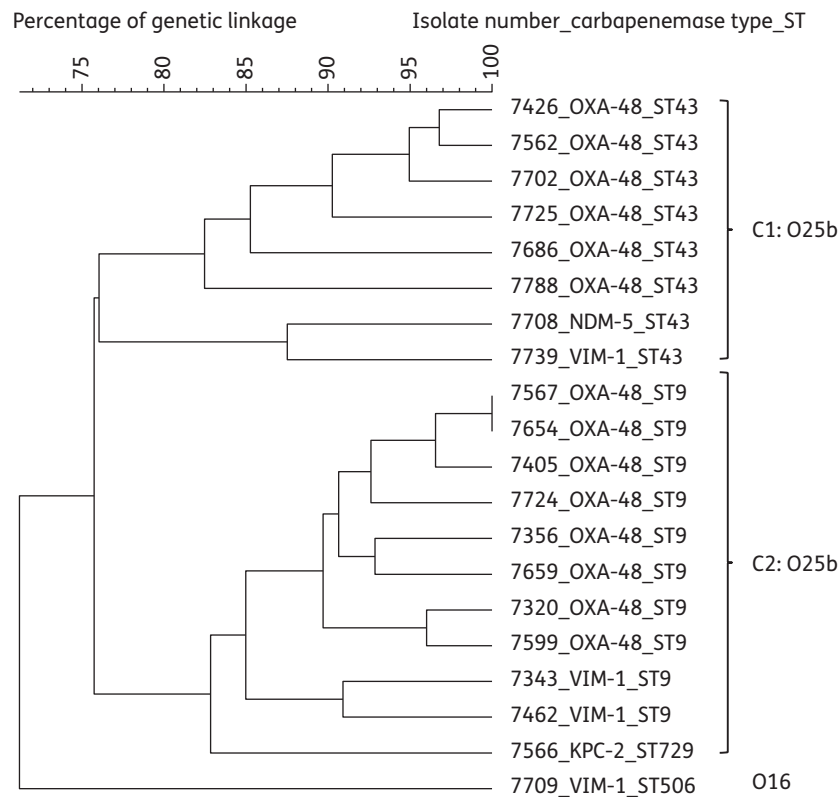**Figure 2.** Dendrogram illustrating the genetic relationships between 20 CP *E. coli* isolates belonging to the Warwick-derived ST131. Isolate numbers, carbapenemase types and Pasteur-derived STs are arranged to the right of the dendrogram.

### Comparison of MLST by the Pasteur and Warwick typing schemes

Sixty-seven different STs were identified using the Pasteur typing scheme. The most prevalent STs and their phylogenetic groups are

included in Table 3. There was a non-univocal correlation between the STs determined by the two schemes. Some of the more prevalent STs identified by the classic Warwick scheme corresponded to several STs identified by the Pasteur scheme and vice versa (Table 3). The predominant ST131 clone identified with the

Warwick scheme corresponded to four different STs identified with the Pasteur scheme; these were ST9, ST43, ST506 and the newly identified ST729 clone. The correspondence between the Warwick-derived ST131 and the Pasteur-derived ST43 and ST506 had been described previously.<sup>44</sup> These data suggest that, within a single ST, additional population diversity could exist. However, correspondence between phylogroups and STs obtained by both MLST schemes was constant (Table 3). The ability to identify clones/phylogroups in *E. coli* is crucial, as a number of ecological and clinical features vary with its phylogenetic origins.<sup>45</sup>

This study provides novel and valuable information about the population structure, determined by two different MLST schemes, of an extensive collection of CP *E. coli* isolates. The Pasteur MLST scheme had a higher discrimination capability (SDI = 55.4%) than the Warwick MLST scheme (SDI = 48.8%).

PFGE assays showed that all isolates belonging to the same Warwick-derived ST had a genetic homology of >75% (data not shown). However, in the case of the Warwick-derived ST131, two main clusters, C1 and C2, were identified by PFGE. These clusters matched three Pasteur STs: ST43, which contained 8 isolates and corresponded to C1; ST9, which had 10 isolates and corresponded to C2; and ST729, which contained 1 isolate and corresponded to C2 (Figure 2). These 19 isolates corresponding to C1 and C2 belonged to the serotype O25b (Figure 2). The remaining ST131 isolate was not related to clusters C1 and C2, corresponded to the Pasteur-derived ST506 and belonged to the serotype O16 (Figure 2). Previously, O16-ST131 isolates have been described in the USA, Europe and Asia as a phylogenetic clade distinct from the classic O25b-ST131 clone.<sup>44</sup>

According to the typing data (phylogroups, MLST and PFGE) provided in this study, the population structure of CP *E. coli* in Spain appears to be very diverse (Tables 2 and 3), suggesting that plasmid-mediated transmission of carbapenemases may be highly effective.

## Conclusions

In summary, we carried out a multicentre study in order to characterize the microbiological and molecular determinants of CP *E. coli* in Spain. Although the overall ability to produce carbapenemase remained rare in *E. coli*, an important upward trend was observed over the last few years, mainly due to the proliferation of OXA-48 producers. The disc diffusion method with ertapenem according to EUCAST criteria was the best method for detecting the reduced susceptibility to carbapenems in CP *E. coli*. A polyclonal population of CP *E. coli* was observed. The high-risk Warwick-derived ST131 clone predominated. The Pasteur typing scheme had a higher discrimination capability than the Warwick scheme. The classical Warwick-derived ST131 clone corresponded to four different Pasteur-derived STs: ST9, ST43, ST506 and ST729. The early identification of CP *E. coli*, including detection of the high-risk clones implicated in their spread, and the quick and suitable implementation of infection control measures, are crucial for limiting their dissemination in both the hospital and the community setting. Expert guidelines on infection control measures for CPE have been provided by the European Society of Clinical Microbiology and Infectious Diseases.<sup>46</sup>

## Acknowledgements

We thank the Genomics Unit of the Centro Nacional de Microbiología for carrying out the DNA sequencing. We thank the Achtmann group of the

MLST database at the University of Warwick for curating the data and making them publicly available at <http://www2.warwick.ac.uk/mlst>, which is currently supported by a grant from the Biotechnology and Biological Sciences Research Council (BBSRC). We thank the team of curators at the Institut Pasteur MLST and whole-genome MLST databases for curating the data and making them publicly available at <http://bigsd.web.pasteur.fr/>.

## Other Members of the Spanish Collaborating Group for the Antibiotic Resistance Surveillance Programme

José Esteban Aznar and Carolina Campelo (Laboratorio BrSalud, San Sebastián de los Reyes, Madrid), Isabel Sánchez-Romero, Rocío Martínez and Beatriz Orden (H. Universitario Puerta de Hierro-Majadahonda, Madrid), Alejandro González and Sonia Solís (H. Universitario de Guadalajara, Guadalajara), Luisa García-Picazo (H. El Escorial, Madrid), Emilia Cercenado (H. General Universitario Gregorio Marañón, Madrid), Almudena Alhambra, Santiago Salso and Carmen Gómez (H.M. Hospitales, Madrid), Juan Ignacio Alós (H. Universitario de Getafe, Madrid), M<sup>a</sup> Dolores Miguel-Martínez (H. de Cabueñes, Gijón, Asturias), Teresa Alarcón and Laura Llorca (H. Universitario La Princesa, Madrid), M<sup>a</sup> Teresa Ledo and Firdaous El Knaichi (H. Universitario de Torrejón, Madrid), Gloria Trujillo and Montserrat Morta (Hospital Sant Joan de Deu Fundación Althaia, Barcelona), Belén Hernández (H. Infantil Universitario Niño Jesús, Madrid), Juan Manuel Hernández (H. Universitario Carlos Haya, Málaga), José Vicente Saz (H. Universitario Príncipe de Asturias, Madrid), Dionisia Fontanals (Corporación Sanitaria Parc Taulí, Barcelona), Luis-Moisés Ruiz-Velasco (H. Central de la Cruz Roja San José y Santa Adela, Madrid), Sonia de Miguel (H. Universitario Santa Cristina, Madrid), Luis López-Urrutia (H. Universitario Río Hortega, Valladolid), Concepción Baladón (Lab. Dr. Echevarne, Rafael Carranza (H. General La Mancha Centro, Ciudad Real), Ángel Somodevilla (MEGALAB S.A.), Juanjo Castón and M<sup>a</sup> Dolores Romero (H. General Universitario Ciudad Real), Inocente Cuesta (H. Universitario Médico-Quirúrgico de Jaén, Jaén), Teresa Cabezas (H. de Poniente, Almería), Frederic Gómez (H. Universitario de Tarragona Joan XXIII, Tarragona), M<sup>a</sup> Isabel Antolín (H. de Medina del Campo, Valladolid), Yolanda Carpintero (H. Nuestra Señora de Fátima, Pontevedra) and Fernando Buñuel (H. Universitario Sant Joan de Alicante, Alicante).

## Funding

This work was supported by grant PI12/01242 from the Fondo de Investigación Sanitaria and the Antibiotic Resistance Surveillance Programme of the Centro Nacional de Microbiología (Instituto de Salud Carlos III, Ministerio de Economía y Competitividad) of Spain. It was also supported by grant REIPI RD12/0015 of the Spanish Network for Research in Infectious Diseases, Instituto de Salud Carlos III, Subdirección General de Redes y Centros de Investigación Cooperativa, Ministerio de Economía y Competitividad. A. O. was financially supported by grant CM13/00189 from the Río Hortega Programme, ISCIII-AES.

The Spanish Microbiology National Center (CNM) of the Instituto de Salud Carlos III is a public-health and research institution which operates an active Antibiotic Resistance Surveillance Programme.

## Transparency declarations

None to declare.

## References

- 1 Tzouveleki LS, Markogiannakis A, Psychogiou M *et al.* Carbapenemases in *Klebsiella pneumoniae* and other Enterobacteriaceae: an evolving crisis of global dimensions. *Clin Microbiol Rev* 2012; **25**: 682–707.

- 2 Oteo J, Ortega A, Bartolomé R *et al.* Prospective multicenter study of carbapenemase-producing Enterobacteriaceae from 83 hospitals in Spain reveals high in vitro susceptibility to colistin and meropenem. *Antimicrob Agents Chemother* 2015; **59**: 3406–12.
- 3 Nordmann P, Poirel L. The difficult-to-control spread of carbapenemase producers among Enterobacteriaceae worldwide. *Clin Microbiol Infect* 2014; **20**: 821–30.
- 4 Peirano G, Bradford PA, Kazmierczak KM *et al.* Global incidence of carbapenemase-producing *Escherichia coli* ST131. *Emerg Infect Dis* 2014; **20**: 1928–31.
- 5 Clermont O, Christenson JK, Denamur E *et al.* The Clermont *Escherichia coli* phylo-typing method revisited: improvement of specificity and detection of new phylo-groups. *Environ Microbiol Rep* 2013; **5**: 58–65.
- 6 Oteo J, González-López JJ, Ortega A *et al.* Inhibitor-resistant TEM- and OXA-1-producing *Escherichia coli* isolates resistant to amoxicillin-clavulanate are more clonal and possess lower virulence gene content than susceptible clinical isolates. *Antimicrob Agents Chemother* 2014; **58**: 3874–81.
- 7 Oteo J, Pérez-Vázquez M, Campos J. Extended-spectrum  $\beta$ -lactamase producing *Escherichia coli*: changing epidemiology and clinical impact. *Curr Opin Infect Dis* 2010; **23**: 320–6.
- 8 Oteo J, Saez D, Bautista V *et al.* Carbapenemase-producing Enterobacteriaceae in Spain in 2012. *Antimicrob Agents Chemother* 2013; **57**: 6344–7.
- 9 Matuschek E, Brown DF, Kahlmeter G. Development of the EUCAST disk diffusion antimicrobial susceptibility testing method and its implementation in routine microbiology laboratories. *Clin Microbiol Infect* 2014; **20**: O255–66.
- 10 EUCAST. [http://www.eucast.org/clinical\\_breakpoints/](http://www.eucast.org/clinical_breakpoints/).
- 11 EUCAST. *EUCAST Guidelines for Detection of Resistance Mechanisms and Specific Resistances of Clinical and/or Epidemiological Importance, Version 1.0, December 2013*. [http://www.eucast.org/fileadmin/src/media/PDFs/EUCAST\\_files/Resistance\\_mechanisms/EUCAST\\_detection\\_of\\_resistance\\_mechanisms\\_v1.0\\_20131211.pdf](http://www.eucast.org/fileadmin/src/media/PDFs/EUCAST_files/Resistance_mechanisms/EUCAST_detection_of_resistance_mechanisms_v1.0_20131211.pdf).
- 12 Nordmann P, Poirel L, Dortet L. Rapid detection of carbapenemase producing Enterobacteriaceae. *Emerg Infect Dis* 2012; **18**: 1503–7.
- 13 Clinical and Laboratory Standards Institute. *Performance Standards for Antimicrobial Susceptibility Testing: Twenty-fourth Informational Supplement M100-S24*. CLSI, Wayne, PA, USA, 2014.
- 14 Woodford N, Tierno PM Jr, Young K *et al.* Outbreak of *Klebsiella pneumoniae* producing a new carbapenem-hydrolyzing class A  $\beta$ -lactamase, KPC-3, in a New York medical center. *Antimicrob Agents Chemother* 2004; **48**: 4793–9.
- 15 Oteo J, Domingo-García D, Fernández-Romero S *et al.* Abdominal abscess due to NDM-1-producing *Klebsiella pneumoniae* in Spain. *J Med Microbiol* 2012; **61**: 864–7.
- 16 Oteo J, Navarro C, Cercenado E *et al.* Spread of *Escherichia coli* strains with high-level cefotaxime and ceftazidime resistance between the community, long-term care facilities, and hospital institutions. *J Clin Microbiol* 2006; **44**: 2359–66.
- 17 Pérez-Pérez FJ, Hanson ND. Detection of plasmid-mediated AmpC  $\beta$ -lactamase genes in clinical isolates by using multiplex PCR. *J Clin Microbiol* 2002; **40**: 2153–62.
- 18 Clermont O, Lavollay M, Vimont S *et al.* The CTX-M-15-producing *Escherichia coli* diffusing clone belongs to a highly virulent B2 phylogenetic subgroup. *J Antimicrob Chemother* 2008; **61**: 1024–8.
- 19 Clermont O, Johnson JR, Menard M *et al.* Determination of *Escherichia coli* O types by allele-specific polymerase chain reaction: application to the O types involved in human septicemia. *Diagn Microbiol Infect Dis* 2007; **57**: 129–36.
- 20 Gastmeier P, Schwab F, Bärwolff S *et al.* Correlation between the genetic diversity of nosocomial pathogens and their survival time in intensive care units. *J Hosp Infect* 2006; **62**: 181–6.
- 21 Cai JC, Zhang R, Hu YY *et al.* Emergence of *Escherichia coli* sequence type 131 isolates producing KPC-2 carbapenemase in China. *Antimicrob Agents Chemother* 2014; **58**: 1146–52.
- 22 Robert J, Pantel A, Mérens A *et al.* Incidence rates of carbapenemase-producing Enterobacteriaceae clinical isolates in France: a prospective nationwide study in 2011–12. *J Antimicrob Chemother* 2014; **69**: 2706–12.
- 23 Manageiro V, Ferreira E, Almeida J *et al.* Predominance of KPC-3 in a survey for carbapenemase-producing Enterobacteriaceae in Portugal. *Antimicrob Agents Chemother* 2015; **59**: 3588–92.
- 24 Österblad M, Kirveskari J, Hakanen AJ *et al.* Carbapenemase-producing Enterobacteriaceae in Finland: the first years (2008–11). *J Antimicrob Chemother* 2012; **67**: 2860–4.
- 25 Oteo J, Miró E, Pérez-Vázquez M *et al.* Evolution of carbapenemase-producing Enterobacteriaceae at the global and national level: what should be expected in the future? *Enferm Infecc Microbiol Clin* 2014; **32** Suppl 4: 17–23.
- 26 Palacios-Baena ZR, Oteo J, Conejo C *et al.* Comprehensive clinical and epidemiological assessment of colonisation and infection due to carbapenemase-producing Enterobacteriaceae in Spain. *J Infect* 2016; **72**: 152–60.
- 27 Albiger B, Glasner C, Struelens M *et al.* Carbapenemase-producing Enterobacteriaceae in Europe: assessment by national experts from 38 countries. *Euro Surveill* 2015; **20**: pii=30062.
- 28 Poirel L, Potron A, Nordmann P. OXA-48-like carbapenemases: the phantom menace. *J Antimicrob Chemother* 2012; **67**: 1597–606.
- 29 Beyrouthy R, Robin F, Dabboussi F *et al.* Carbapenemase and virulence factors of Enterobacteriaceae in North Lebanon between 2008 and 2012: evolution via endemic spread of OXA-48. *J Antimicrob Chemother* 2014; **69**: 2699–705.
- 30 Glupczynski Y, Huang TD, Bouchahrouf W *et al.* Rapid emergence and spread of OXA-48-producing carbapenem-resistant Enterobacteriaceae isolates in Belgian hospitals. *Int J Antimicrob Agents* 2012; **39**: 168–72.
- 31 Dortet L, Cuzon G, Nordmann P. Dissemination of carbapenemase-producing Enterobacteriaceae in France, 2012. *J Antimicrob Chemother* 2014; **69**: 623–7.
- 32 Zhang F, Zhu D, Xie L *et al.* Molecular epidemiology of carbapenemase-producing *Escherichia coli* and the prevalence of ST131 subclone H30 in Shanghai, China. *Eur J Clin Microbiol Infect Dis* 2015; **34**: 1263–9.
- 33 Arana DM, Saez D, García-Hierro P *et al.* Concurrent interspecies and clonal dissemination of OXA-48 carbapenemase. *Clin Microbiol Infect* 2015; **21**: 148.e1–4.
- 34 Potron A, Poirel L, Rondinaud E *et al.* Intercontinental spread of OXA-48  $\beta$ -lactamase-producing Enterobacteriaceae over a 11-year-period, 2001 to 2011. *Euro Surveill* 2013; **18**: pii=20549.
- 35 Poirel L, Bernabeu S, Fortineau N *et al.* Emergence of OXA-48-producing *Escherichia coli* clone ST38 in France. *Antimicrob Agents Chemother* 2011; **55**: 4937–8.
- 36 Poirel L, Castanheira M, Carrère A *et al.* OXA-163, an OXA-48-related class D  $\beta$ -lactamase with extended activity toward expanded-spectrum cephalosporins. *Antimicrob Agents Chemother* 2011; **55**: 2546–51.
- 37 Jamal WY, Albert MJ, Khodakhast F *et al.* Emergence of new sequence type OXA-48 carbapenemase-producing Enterobacteriaceae in Kuwait. *Microb Drug Resist* 2015; **21**: 329–34.
- 38 Lerner A, Solter E, Rachi E *et al.* Detection and characterization of carbapenemase-producing Enterobacteriaceae in wounded Syrian patients admitted to hospitals in northern Israel. *Eur J Clin Microbiol Infect Dis* 2016; **35**: 149–54.
- 39 Hartl R, Widhalm S, Kerschner H *et al.* Temocillin and meropenem to discriminate resistance mechanisms leading to decreased carbapenem

susceptibility with focus on OXA-48 in Enterobacteriaceae. *Clin Microbiol Infect* 2013; **19**: E230–2.

**40** Woodford N, Pike R, Meunier D et al. *In vitro* activity of temocillin against multidrug-resistant clinical isolates of *Escherichia coli*, *Klebsiella* spp. and *Enterobacter* spp., and evaluation of high-level temocillin resistance as a diagnostic marker for OXA-48 carbapenemase. *J Antimicrob Chemother* 2014; **69**: 564–7.

**41** Adler A, Hussein O, Ben-David D et al. Persistence of *Klebsiella pneumoniae* ST258 as the predominant clone of carbapenemase-producing Enterobacteriaceae in post-acute-care hospitals in Israel, 2008–13. *J Antimicrob Chemother* 2015; **70**: 89–92.

**42** Del Franco M, Paone L, Novati R et al. Molecular epidemiology of carbapenem resistant Enterobacteriaceae in Valle d'Aosta region, Italy, shows the emergence of KPC-2 producing *Klebsiella pneumoniae* clonal complex 101 (ST101 and ST1789). *BMC Microbiol* 2015; **15**: 260.

**43** Chen CM, Ke SC, Li CR et al. Prolonged clonal spreading and dynamic changes in antimicrobial resistance of *Escherichia coli* ST68 among patients who stayed in a respiratory care ward. *J Med Microbiol* 2014; **63**: 1531–41.

**44** Johnson JR, Clermont O, Johnston B et al. Rapid and specific detection, molecular epidemiology, and experimental virulence of the O16 subgroup within *Escherichia coli* sequence type 131. *J Clin Microbiol* 2014; **52**: 1358–65.

**45** Clermont O, Gordon D, Denamur E. Guide to the various phylogenetic classification schemes for *Escherichia coli* and the correspondence among schemes. *Microbiology* 2015; **161**: 980–8.

**46** Carmeli Y, Akova M, Cornaglia G et al. Controlling the spread of carbapenemase-producing Gram-negatives: therapeutic approach and infection control. *Clin Microbiol Infect* 2010; **16**: 102–11.
